# Supplementary material for: Differentiated Caco-2 cell monolayers exhibit adaptation in the transport and metabolism of flavan-3-ols with chronic exposure to both isolated flavan-3-ols and enriched extracts
Source: Royal Society of Chemistry journal article supplement (doi:10.1039/c6fo01289b), 2016-11-03
Supplement: c6fo01289b1.pdf [file c6fo01289b1.pdf]

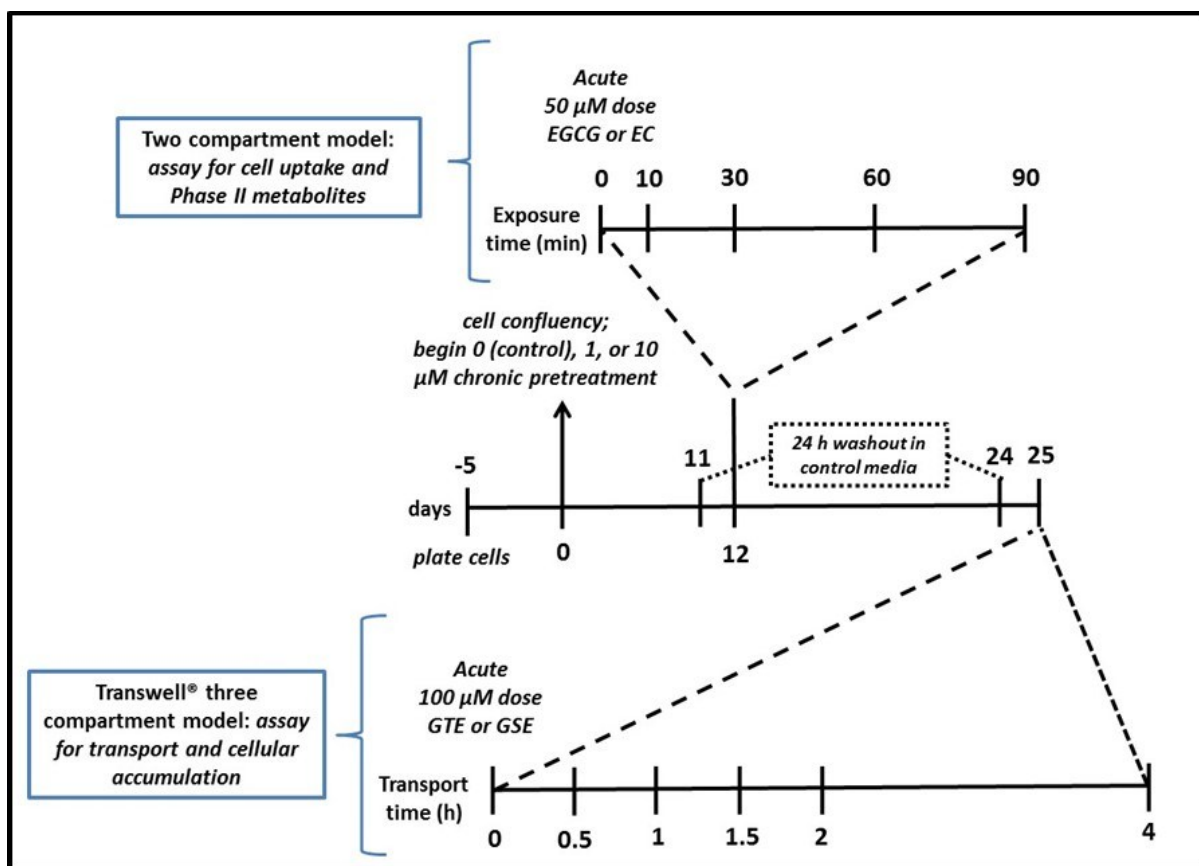

**Supplementary Figure 1.** Experimental design to simulate chronic treatment of Caco-2 cell monolayers. Cells were cultured in growth media with either 0  $\mu\text{M}$  (control), 1  $\mu\text{M}$ , or 10  $\mu\text{M}$  of EGCG, EC, green tea, or grape seed extract added to the apical chamber. After all cell treatments were cultured in growth media containing no added flavan-3-ols (control media) for 24 h, transport was assessed over 4 h in the three compartment model with a 100  $\mu\text{M}$  acute dose of green tea or grape seed extract, while uptake and metabolism was assessed over 90 min in the two compartment model using a 50  $\mu\text{M}$  acute dose. Abbreviations: GTE, green tea extract; GSE, grape seed extract; EGCG, epigallocatechin gallate; EC, epicatechin.
